# Supplementary material for: The use of genetic programming to develop a predictor of swash excursion on sandy beaches
Source: Copernicus journal article supplement (doi:10.5194/nhess-2017-232), 2017-10-04
Supplement: Supplementary file [file nhess-2017-232-AC2-supplement.pdf]

## **Response to Referee #2**

**Referee comments are in plain text**

**Author comments are in BOLD**

This is an interesting paper and an important contribution to the prediction of wave runup and swash excursion. Results are presented in a clear and focused way. The manuscript is well written with a suitable and comprehensible outline. The figures are well readable and have informative captions. The basic idea and the application of the genetic programming algorithm are presented and discussed in a clear manner also understandable for scientists not familiar with machine learning techniques. The discussion of the physical meaning of the generated predictors is very valuable. A comparison with the results of previous predictors on the same dataset gives is well done and illuminates the advantages of the Genetic Programming approach. The manuscript should be published in the journal in its present state.

**We thank the Referee for reading the manuscript and providing these positive comments.**
